# Supplementary material for: Long-term groundwater recharge rates across India by in situ measurements
Source: Copernicus journal article supplement (doi:10.5194/hess-2018-313), 2018-07-17
Supplement: Supplementary file 1 [file hess-2018-313-supplement.pdf]

1 **Long-term groundwater recharge rates across India by in situ**  
2 **measurements**

3 **Soumendra N. Bhanja<sup>1,2</sup>, Abhijit Mukherjee<sup>1,3,4</sup>, Rangarajan Ramaswamy<sup>5</sup>, Bridget R.**  
4 **Scanlon<sup>6</sup>, Pragnaditya Malakar<sup>1</sup>, Shubha Verma<sup>7</sup>**

5 <sup>1</sup>Department of Geology and Geophysics, Indian Institute of Technology Kharagpur, West  
6 Bengal 721302, India

7 <sup>2</sup>Presently at Faculty of Science and Technology, Athabasca University, Alberta T9S3A3,  
8 Canada

9 <sup>3</sup>School of Environmental Science and Engineering, Indian Institute of Technology Kharagpur,  
10 West Bengal 721302, India

11 <sup>4</sup>Hydroscience and Policy Advisory Group, Indian Institute of Technology Kharagpur, West  
12 Bengal 721302, India

13 <sup>5</sup>National Geophysical Research Institute, Uppal Road, Hyderabad 500 007, India

14 <sup>6</sup>Bureau of Economic Geology, Jackson School of Geosciences, The University of Texas at  
15 Austin, Texas 78713, USA

16 <sup>7</sup>Department of Civil Engineering, Indian Institute of Technology Kharagpur, West Bengal  
17 721302, India

18 \*Corresponding authors: (soumendrabanja@gmail.com) and Abhijit Mukherjee

19 *Correspondence to:* Soumendra N. Bhanja (soumendrabanja@gmail.com) and Abhijit Mukherjee  
20 (amukh2@gmail.com, abhijit@gg.iitkgp.ernet.in)

21 **Details of Tritium Injection approach:**

22 The tritiated water has been injected in the soil layer below root zone or the zero flux plane (0.6-  
23 0.8 m below ground level; Rangarajan et al., 2000; Healy, 2010). After a rainfall event, the  
24 tritium containing layer moves downward due to infiltration. The vertical displacement of the  
25 injected tritium peak is directly proportional to the rate of water infiltration within the studied  
26 time period (Rangarajan et al., 2010).

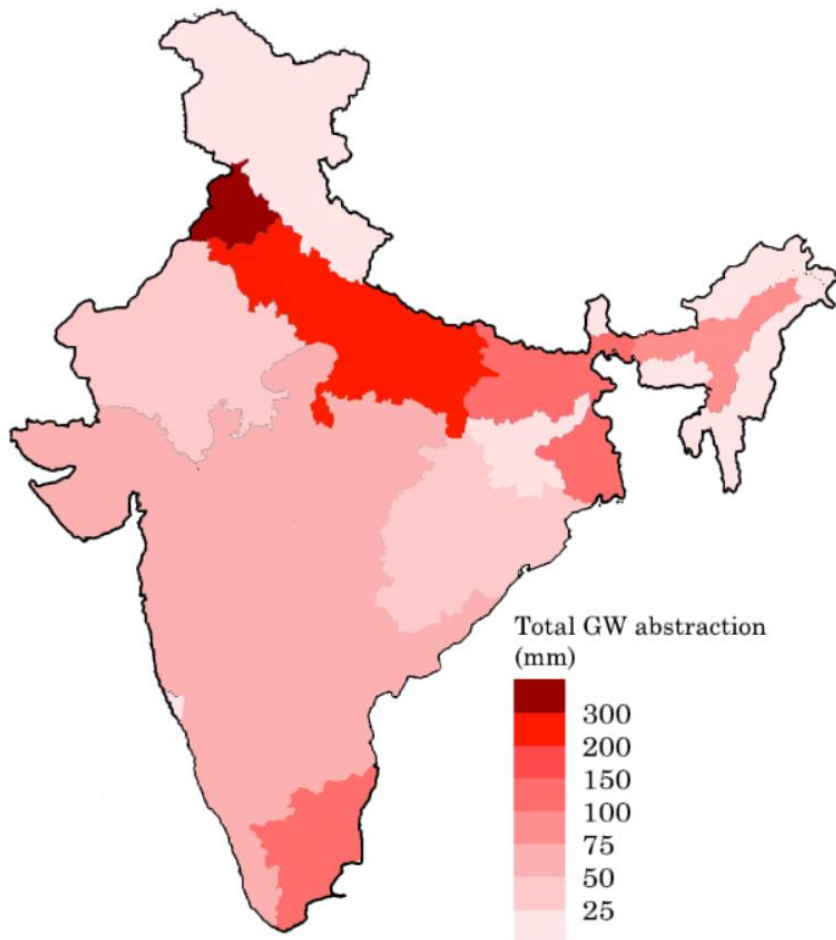

27

28 **Supplementary Figure 1:** Map showing state-wise total groundwater abstraction ( $10^{-6}$  km<sup>3</sup> per  
29 km<sup>2</sup> of land area) for the year 2009 (CGWB, 2012a)

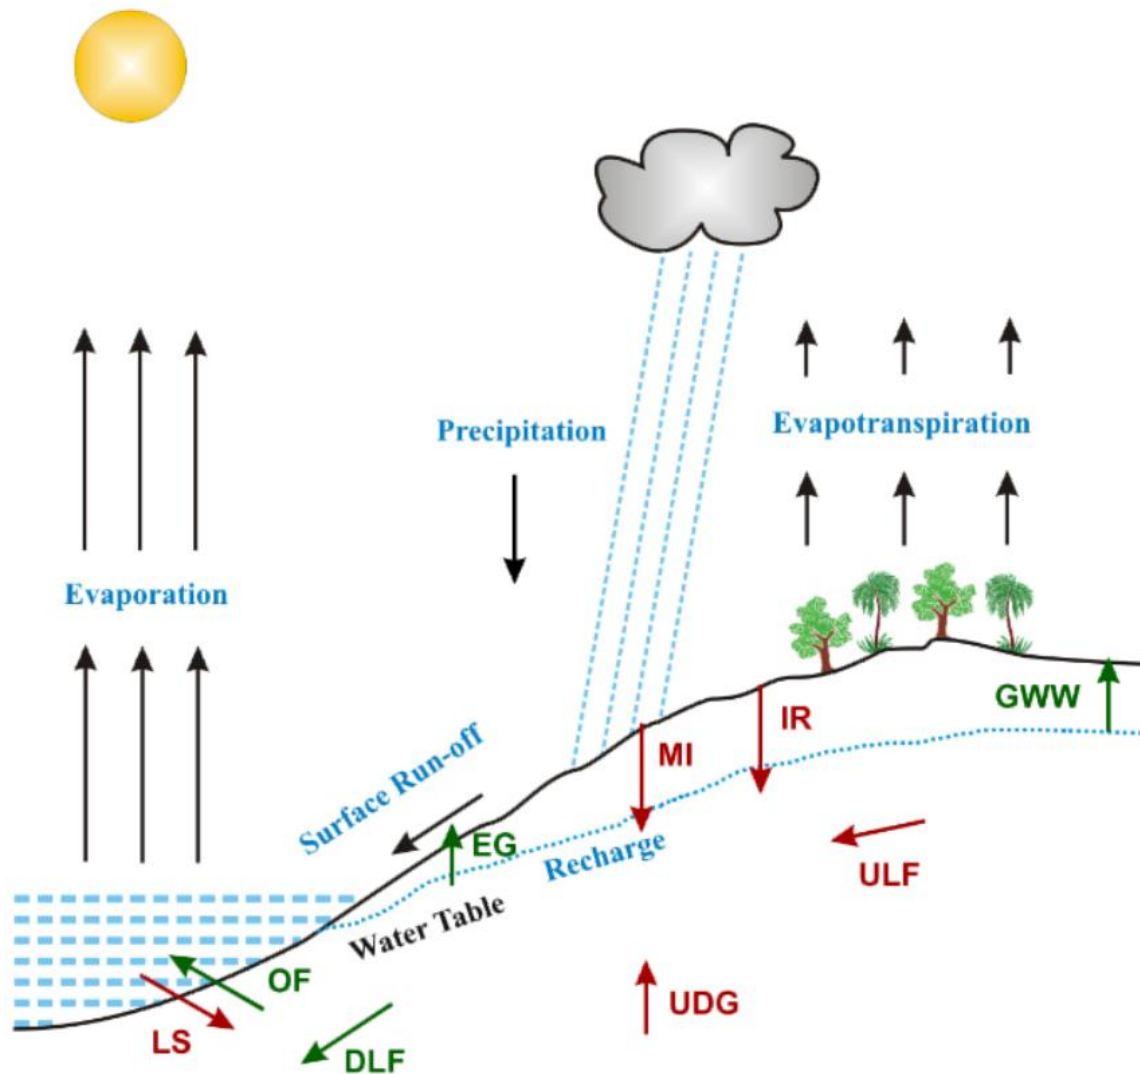

30

31 **Supplementary Figure 2:** Groundwater recharge processes. MI = Meteoric Inflow through  
 32 precipitation; IR = Irrigational return flow; LS = Lateral seepage from surface water; ULF =  
 33 Flow from upgradient location along flowpath; UDG = Upwelling from deeper groundwater  
 34 systems; OF = Outflow by baseflow and discharge; GWW = Groundwater withdrawal; DLF  
 35 = Flow toward down gradient along flow path; EG = Evaporation from groundwater
